# Supplementary material for: Synthesis and properties of [Pt(4-CO2CH3-py)2(mnt)]: comparison of pyridyl and bipyridyl-based dyes for solar cells
Source: Royal Society of Chemistry journal article supplement (doi:10.1039/b811943k), 2008-01-01
Supplement: b811943k.pdf [file b811943k.pdf]

## Synthesis and Properties of [Pt(4-CO<sub>2</sub>CH<sub>3</sub>-py)<sub>2</sub>(mnt)]; comparison of pyridyl and bipyridyl-based dyes for Solar Cells.

Lucy P. Moorcraft<sup>a</sup>, Ana Morandeira<sup>b</sup>, James R. Durrant<sup>b</sup>, James R. Jennings<sup>c</sup>,  
Laurence M. Peter<sup>c</sup>, Simon Parsons<sup>a</sup>, Andrew Turner<sup>a</sup>, Lesley J. Yellowlees<sup>a</sup> and Neil  
Robertson<sup>\*a</sup>

<sup>a</sup> School of Chemistry, King's Buildings, West Mains Road, Edinburgh, UK, EH9 3JJ Fax: +44 131 6504743; Tel: +44 131 6504755; E-mail: [neil.robertson@ed.ac.uk](mailto:neil.robertson@ed.ac.uk)

<sup>b</sup> Centre for Electronic Materials and Devices, Department of Chemistry, Imperial College London, UK, SW7 2AZ.

<sup>c</sup> Department of Chemistry, University of Bath, Bath, UK, BA2 7AY.

### Supplementary Information

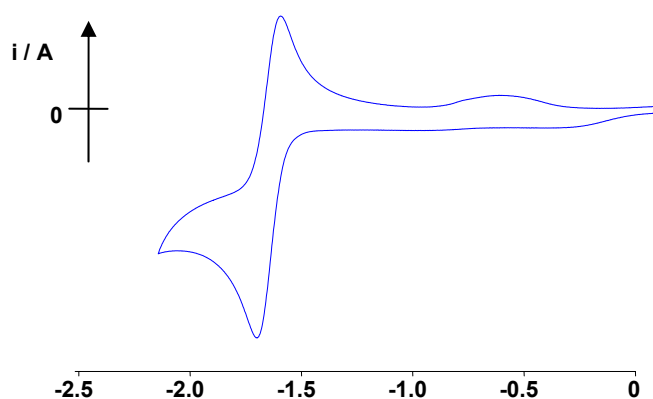

**Figure S1** Cyclic Voltammetry of 4-CO<sub>2</sub>CH<sub>3</sub>-py in 0.1M TBABF<sub>4</sub> / DMF at 298 K. Scan rate 0.2 V s<sup>-1</sup>. (All electrochemical measurements taken versus Ag/AgCl (saturated KCl) reference electrode against which the ferrocenium/ferrocene couple was measured to be +0.55 V)

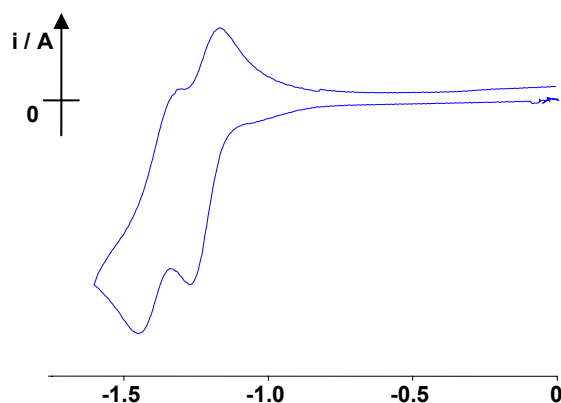

**Figure S2** Cyclic Voltammetry of [PtCl<sub>2</sub>(4-CO<sub>2</sub>CH<sub>3</sub>-py)<sub>2</sub>] in 0.1M TBABF<sub>4</sub> / DMF at 298 K. Scan rate 0.8 V s<sup>-1</sup>.

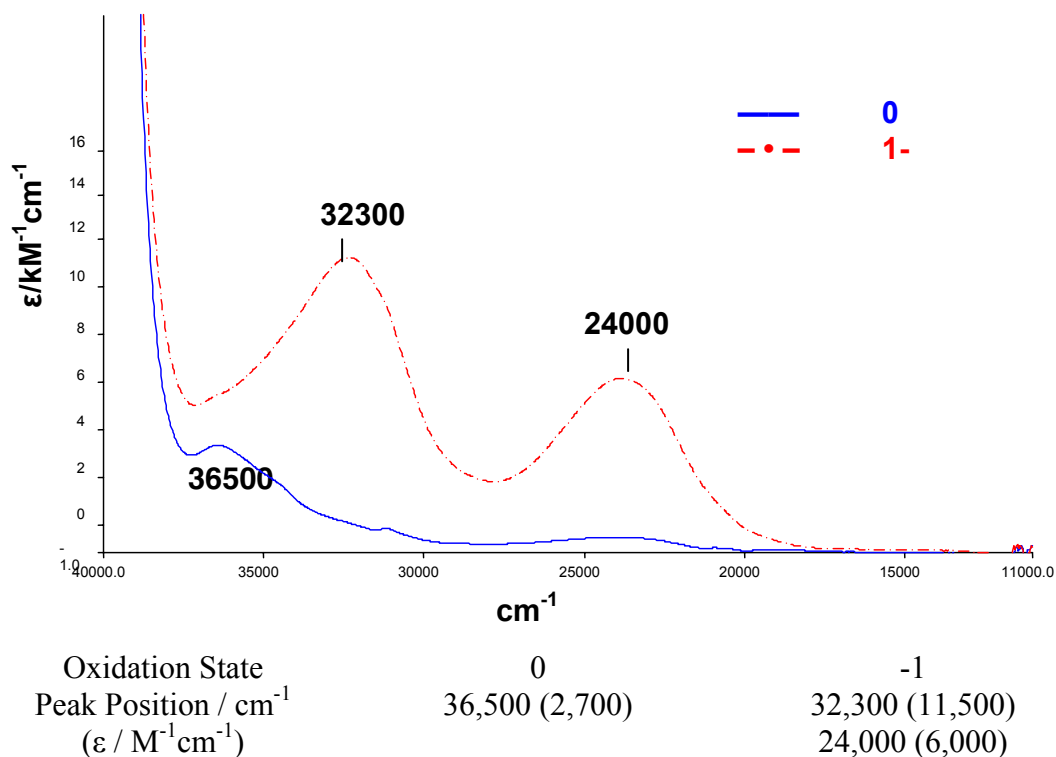

Figure S3 and Table S1 OTTL of 4-CO<sub>2</sub>CH<sub>3</sub>-py in 0.1 M TBABF<sub>4</sub> / DMF at 233 K,  $E_{\text{gen}} = -2.28 \text{ V (1-)}$

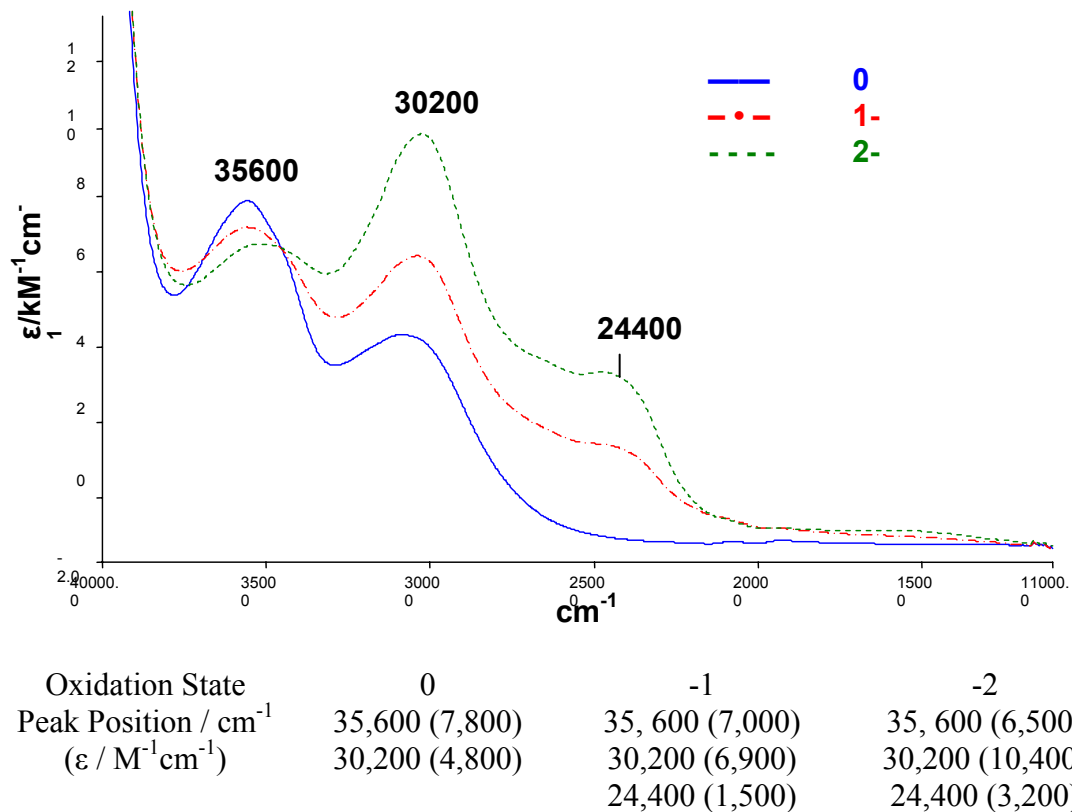

**Figure S4 and Table S2** OTTLE of  $[\text{PtCl}_2(4\text{-CO}_2\text{CH}_3\text{-py})_2]$  in 0.1 M TBABF<sub>4</sub> / DMF at 233 K.  $E_{\text{gen}} = -1.3$  V (1-) and  $-1.6$  V (2-)

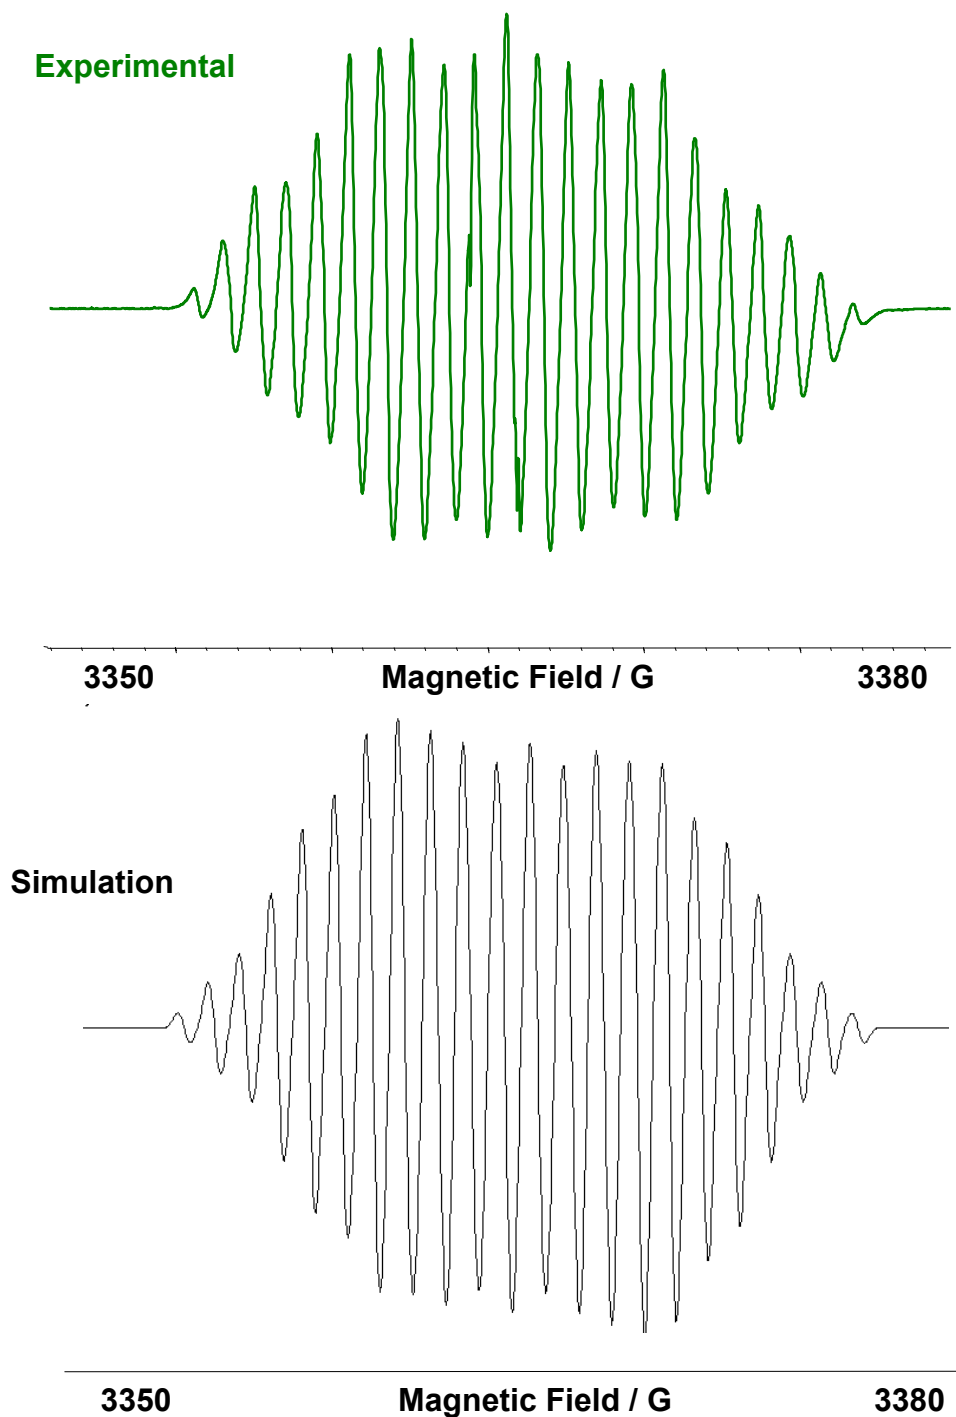

**Figure S5** EPR Spectrum and Simulation of  $[4\text{-CO}_2\text{CH}_3\text{-py}]^-$  in 0.1 M TBABF<sub>4</sub> / DMF at 233 K,  $E_{\text{gen}} = -1.8$  V.

| Parameter | [4-CO <sub>2</sub> CH <sub>3</sub> -py] <sup>-</sup> |
|-----------|------------------------------------------------------|
| 3H        | 1.050 G                                              |
| 2H        | 0.850 G                                              |
| 2H        | 2.985 G                                              |
| 1N        | 5.090 G                                              |
| g         | 2.0028                                               |
| Δ         | 0.35 G                                               |

**Table S3** EPR Simulation Parameters for [4-CO<sub>2</sub>CH<sub>3</sub>-py]<sup>-</sup>

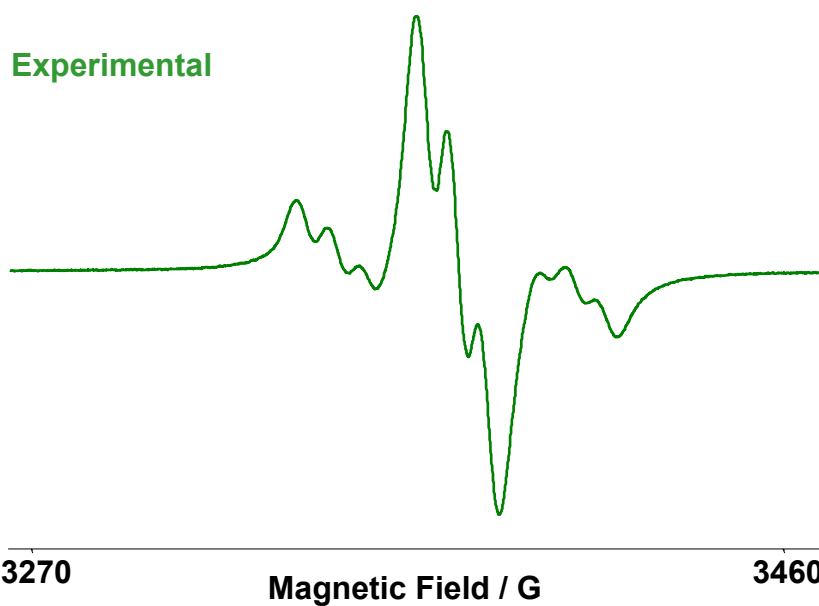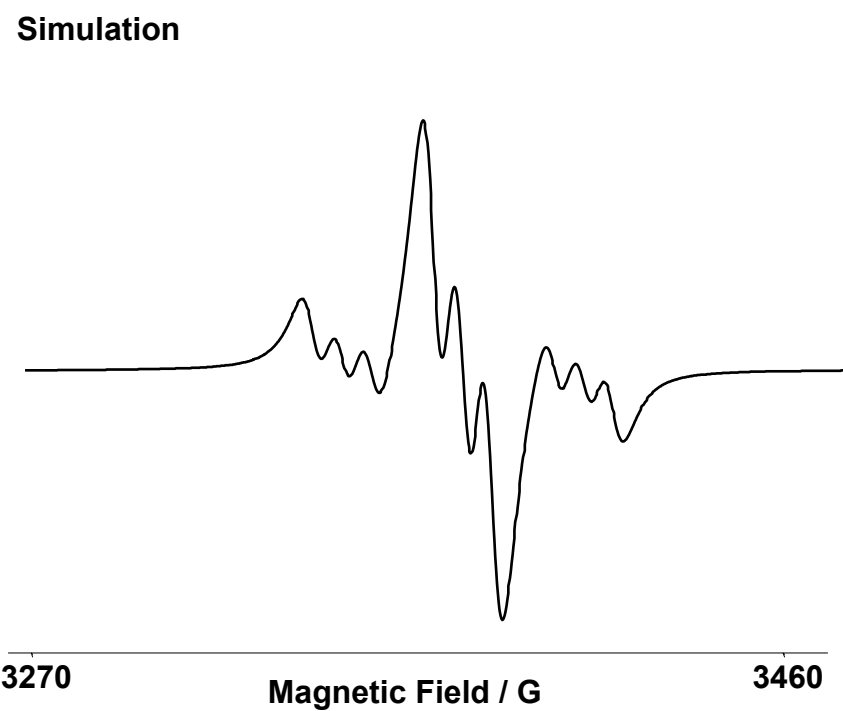

**Figure S6** EPR Spectrum and Simulation of  $[\text{PtCl}_2(4\text{-CO}_2\text{CH}_3\text{-py})_2]^{2-}$  in 0.1 M TBABF<sub>4</sub> / DMF at 233 K,  $E_{\text{gen}} = -1.8$  V.

**Table S4** Energies and Percentage contributions for each atom (see atom numbering scheme below) in the HOMO, LUMO and LUMO+1 isosurfaces from DFT Calculations for  $[\text{Pt}(4\text{-CO}_2\text{CH}_3\text{-py})_2(\text{mnt})]$ .

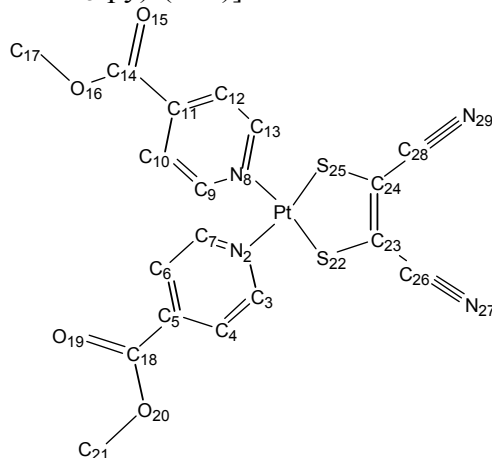

| Atom   | HOMO / %   | LUMO / %   | LUMO+1 / % |
|--------|------------|------------|------------|
| Energy | -5.2525 eV | -3.2289 eV | -3.0136 eV |
| 1 Pt   | 14.44      | 3.19       | 3.62       |
| 2 N    | 0.06       | 22.59      | 0.00       |
| 3 C    | 0.44       | 7.37       | 0.05       |
| 4 C    | 0.25       | 7.06       | 0.06       |
| 5 C    | 0.03       | 22.84      | 0.00       |
| 6 C    | 0.26       | 7.34       | 0.04       |
| 7 C    | 0.51       | 7.06       | 0.05       |
| 8 N    | 0.02       | 0.94       | 22.64      |
| 9 C    | 0.60       | 0.40       | 6.74       |
| 10 C   | 0.00       | 0.26       | 7.09       |
| 11 C   | 0.75       | 0.06       | 22.44      |
| 12 C   | 0.09       | 0.02       | 7.86       |
| 13 C   | 0.51       | 0.01       | 6.53       |
| 14 C   | 0.05       | 0.00       | 7.52       |
| 15 O   | 0.17       | 0.00       | 9.39       |
| 16 O   | 0.06       | 0.00       | 3.73       |
| 17 C   | 0.00       | 0.00       | 0.07       |
| 18 C   | 0.00       | 6.89       | 0.00       |
| 19 O   | 0.00       | 8.93       | 0.00       |
| 20 O   | 0.00       | 3.56       | 0.00       |
| 21 C   | 0.00       | 0.07       | 0.00       |
| 22 S   | 27.80      | 0.05       | 0.77       |
| 23 C   | 9.68       | 0.06       | 0.01       |
| 24 C   | 9.89       | 0.19       | 0.31       |
| 25 S   | 27.33      | 0.53       | 0.45       |
| 26 C   | 0.05       | 0.02       | 0.00       |
| 27 N   | 3.43       | 0.01       | 0.00       |
| 28 C   | 0.05       | 0.02       | 0.01       |

|    |   |      |      |      |
|----|---|------|------|------|
| 29 | N | 3.49 | 0.00 | 0.08 |
| 30 | H | 0.01 | 0.00 | 0.01 |
| 31 | H | 0.00 | 0.00 | 0.00 |
| 32 | H | 0.00 | 0.00 | 0.00 |
| 33 | H | 0.01 | 0.00 | 0.00 |
| 34 | H | 0.00 | 0.03 | 0.00 |
| 35 | H | 0.00 | 0.02 | 0.00 |
| 36 | H | 0.00 | 0.01 | 0.00 |
| 37 | H | 0.00 | 0.00 | 0.00 |
| 38 | H | 0.00 | 0.00 | 0.26 |
| 39 | H | 0.00 | 0.00 | 0.00 |
| 40 | H | 0.00 | 0.00 | 0.26 |
| 41 | H | 0.00 | 0.24 | 0.00 |
| 42 | H | 0.00 | 0.00 | 0.00 |
| 43 | H | 0.00 | 0.24 | 0.00 |

**Table S5** TD-DFT Calculations for [Pt(4-CO<sub>2</sub>CH<sub>3</sub>-py)<sub>2</sub> (mnt)] **3b**. Selected transitions, with oscillator strength greater than 0.1, have been included.

| Excited State | Energy / cm <sup>-1</sup> |          | <i>f</i> | Composition         |
|---------------|---------------------------|----------|----------|---------------------|
|               | Calculated (nm)           | Observed |          |                     |
| 4             | 26311 (380)               | 25700    | 0.10     | HOMO-LUMO+2 76%     |
| 14            | 33922 (295)               | 31600    | 0.27     | HOMO-1 – LUMO+2 86% |
| 18            | 36763 (272)               | 36300    | 0.17     | HOMO-3 – LUMO 77%   |
| 22            | 39208 (255)               |          | 0.14     | HOMO-3– LUMO+1 65%  |
